# Supplementary material
Source: publisher figshare collection journal article supplement (https://acs.figshare.com/ndownloader/files/24686603)
Supplement: Supplementary file 1 [file 24686603]

# ***A Non-Targeted High-Resolution Mass Spectrometry study for extra virgin olive oil adulteration with soft refined oils: preliminary findings from two different laboratories***

*Daniele Cavanna<sup>1,2</sup>, Kamila Hurkova<sup>3</sup>, Zbyněk Džuman<sup>3</sup>, Andrea Serani<sup>4</sup>, Matteo Serani<sup>4</sup>, Chiara Dall'Asta<sup>2</sup>, Monika Tomaniova<sup>3</sup>, Jana Hajslova<sup>3</sup>, Michele Suman<sup>1\*</sup>*

<sup>1</sup>*Advanced Laboratory Research, Barilla G. e R. Fratelli S.p.A., Via Mantova 166-43122 Parma (Italy)*

<sup>2</sup>*Department of Food and Drug, University of Parma, Parco Area delle Scienze 95/A-43124 Parma, (Italy)*

<sup>3</sup>*University of Chemistry and Technology, Prague, Department of Food Analysis and Nutrition, Technická 3, 166 28 Prague 6 (Czech Republic)*

<sup>4</sup>*COTECA Srl Consulenze Tecniche agroindustriali - 56121 Pisa (Italy)*

**\*CORRESPONDING AUTHOR**

Dr. Michele Suman, Ph.D  
Barilla G. R. F.lli SpA, Food Research Labs  
via Mantova 166  
43122 Parma (Italy)  
Phone: +39-0521- 262332  
Email: michele.suman@barilla.com

## **SUPPORTING INFORMATION**

## SECTION 1 – MULTIVARIATE STUDIES

The Total Ion Chromatograms in ESI + ionization of a pure EVOO sample, of mixture A and of mixture H are presented in the figure below.

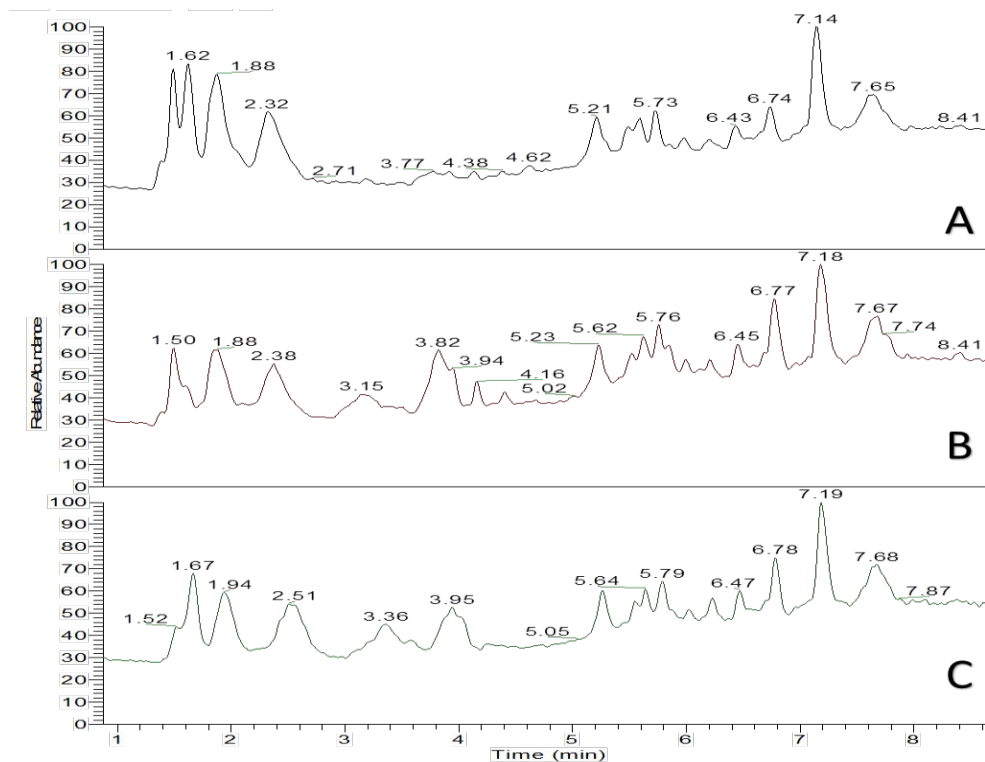

**Figure S1.** Total Ion Chromatograms (ESI + ionization from 1 to 9 min) of (A) pure EVOO sample; (B) mixture A; (C) mixture H

The PCA scores plot of the results obtained for both the ionization modes including the QC samples are presented in figures S2 and S3.

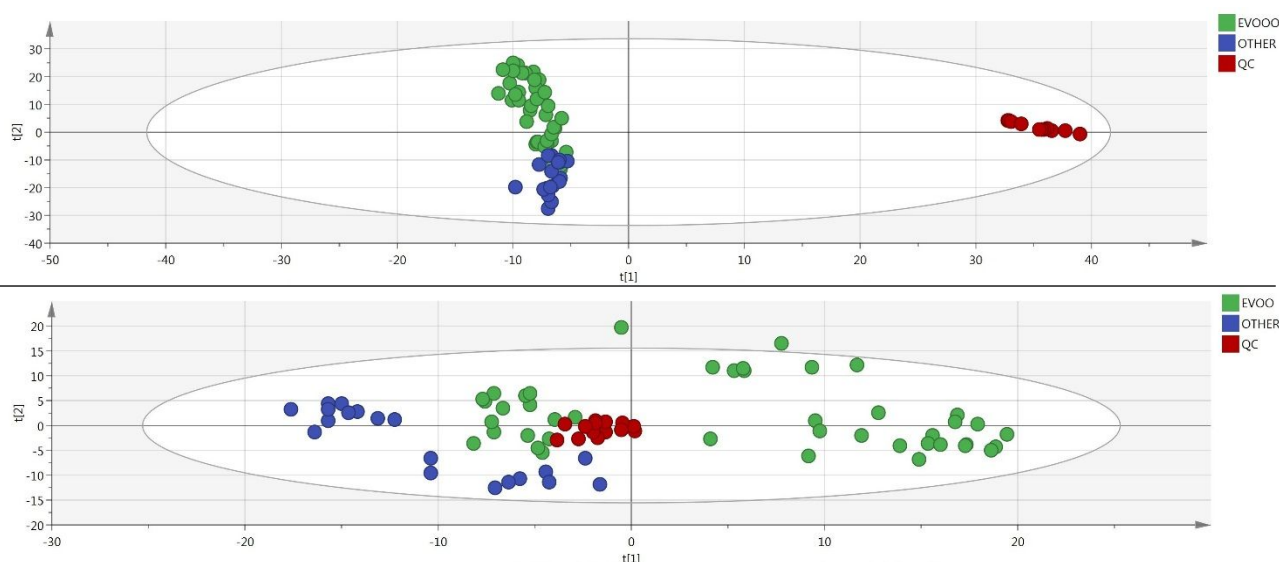

**Figure S2.** ESI + PCA Scores plots of the samples including QCs (X axis: PC1, Y axis: PC2). A: *Laboratory #1*; number of PCs: 9; explained variance of each PC: PC1 33.7%, PC2 22.0%, PC3 8.7%, PC4 5.8%, PC5 4.7%, PC6 4.1%, PC7 2.6%, PC8 2.0%, PC9 1.5%. B: *Laboratory #2*; number of PCs: 10; explained variance of each PC: PC1 18.8%, PC2 7.1%, PC3 5.9%, PC4 4.9%, PC5 3.8%, PC6 3.4%, PC7 3.0%, PC8 2.7%, PC9 2.5%, PC10 2.1%. Green dots: “EVOO” samples; blue dots: “OTHER” samples; red dots. “QC” samples.

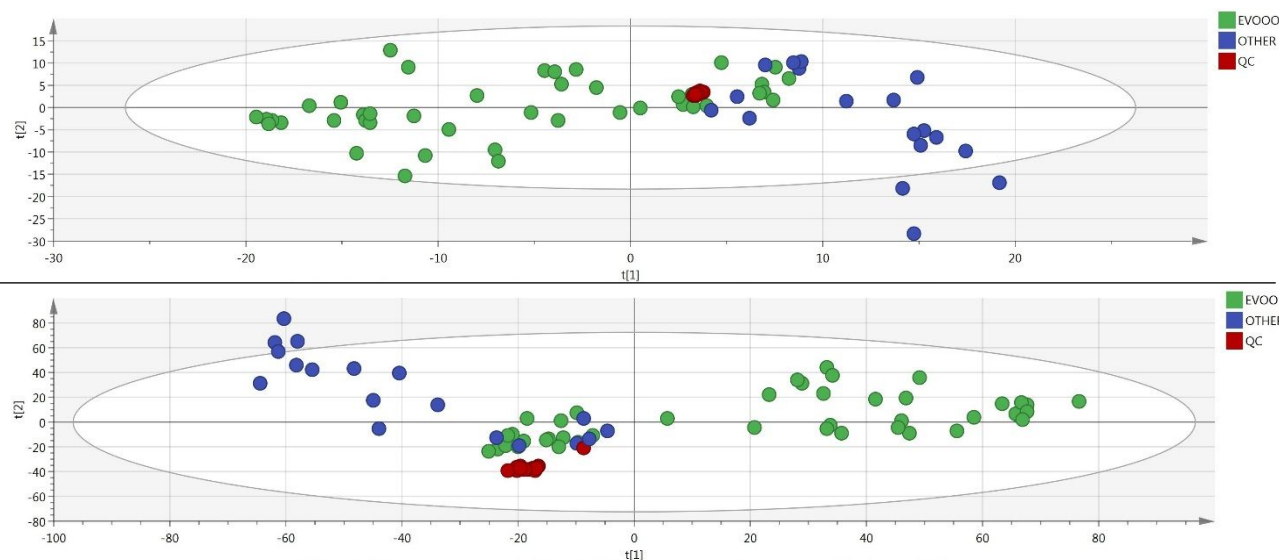

**Figure S3.** ESI - PCA Scores plots of the samples including QCs (X axis: PC1, Y axis: PC2). A: *Laboratory #1*; number of PCs: 14; explained variance of each PC: PC1 32.7%, PC2 15.9%, PC3 11.1%, PC4 6.9%, PC5 5.9%, PC6 3.4%, PC7 2.9%, PC8 2.4%, PC9 2.1%, PC10 1.8%, PC11 1.3%, PC12 1.2%, PC13 1.0%, PC14 1.0%. B: *Laboratory #2*; number of PCs: 5; explained variance of each PC: PC1 21.2%, PC2 9.5%, PC3 8.2%, PC4 6.4%, PC5 5.1%. Green dots: “EVOO” samples; blue dots: “OTHER” samples; red dots. “QC” samples.

The PCA and PLS-DA scores plot of the results obtained with the negative ionization mode are presented in figures S4 and S5.

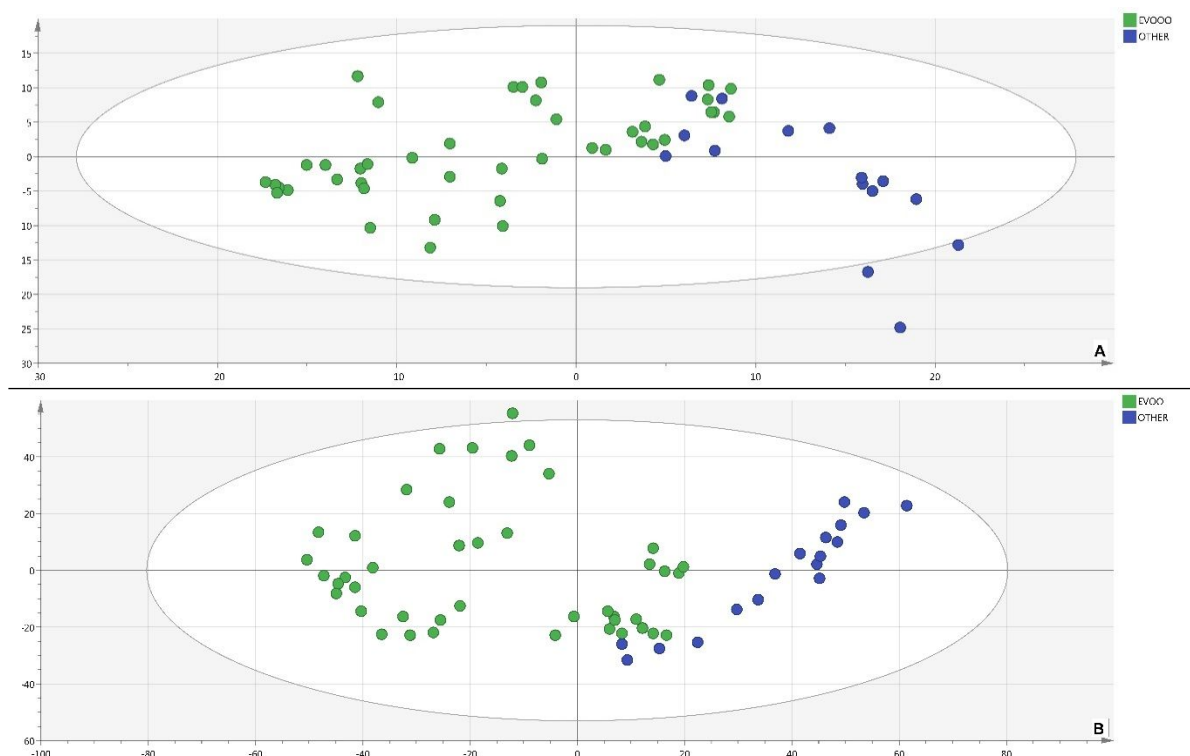

**Figure S4.** ESI - PCA Scores plots of the samples (X axis: PC1, Y axis: PC2). A: *Laboratory #1*; number of PCs: 9; explained variance of each PC: PC1 33.7%, PC2 15.7%, PC3 11.3%, PC4 7.2%, PC5 5.4%, PC6 3.6%, PC7 3.1%, PC8 2.4%, PC9 2.1%. B: *Laboratory #2*; number of PCs: 7; explained variance of each PC: PC1 12.0%, PC2 10.0%, PC3 9.1%, PC4 8.5%, PC5 7.9%, PC6 7.1%, PC7 6.4%. Green dots: “EVOO” samples; blue dots: “OTHER” samples.

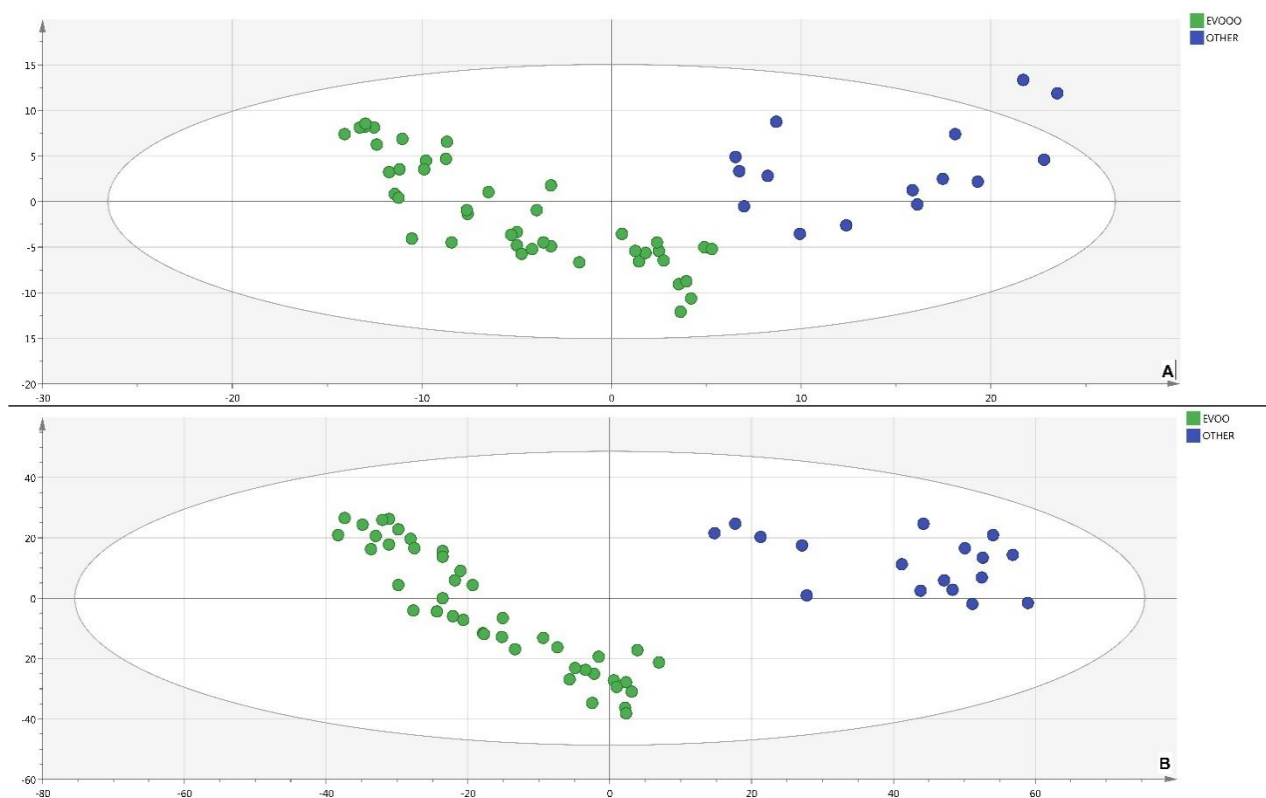

**Figure S5.** ESI - PLS-DA Scores plots of the samples(X axis: Component 1, Y axis: Component 2). **A:** *Laboratory #1*;  $R^2X$  (cum) = 0.682;  $R^2Y$  (cum) = 0.954;  $Q^2$  (cum) = 0.871. **B:** *Laboratory #2*;  $R^2X$  (cum) = 0.235;  $R^2Y$  (cum) = 0.989;  $Q^2$  (cum) = 0.906. Green dots: "EVOO" samples; blue dots: "OTHER" samples.

| SAMPLE   | CLASS    | Laboratory #1              |                                   | Laboratory #2              |                                   |
|----------|----------|----------------------------|-----------------------------------|----------------------------|-----------------------------------|
|          |          | % affinity<br>“EVOO” group | % affinity<br>“NOT EVOO”<br>group | % affinity<br>“EVOO” group | % affinity<br>“NOT EVOO”<br>group |
| CP_30    | EVOO     | 88%                        | 12%                               | 91%                        | 9%                                |
| CP_31    | EVOO     | 100%                       | 0%                                | 92%                        | 8%                                |
| CP_32    | EVOO     | 100%                       | 0%                                | 98%                        | 2%                                |
| DEO3     | NOT EVOO | 0%                         | 100%                              | 22%                        | 78%                               |
| DEO_DEA2 | NOT EVOO | 0%                         | 100%                              | 0%                         | 100%                              |
| MIX_D    | NOT EVOO | 3%                         | 97%                               | 19%                        | 81%                               |

**Table S1:** Predicted group affinity for the samples of the validation set obtained with the ESI+ PLS-DA models. According to the software rules, values higher than 65% correspond to a certain belonging of the sample to that group

| SAMPLE   | CLASS    | Laboratory #1                 |                                   | Laboratory #2                 |                                   |
|----------|----------|-------------------------------|-----------------------------------|-------------------------------|-----------------------------------|
|          |          | % affinity<br>“EVOO”<br>group | % affinity<br>“NOT EVOO”<br>group | % affinity<br>“EVOO”<br>group | % affinity<br>“NOT EVOO”<br>group |
| CP_30    | EVOO     | 100%                          | 0%                                | 96%                           | 4%                                |
| CP_31    | EVOO     | 100%                          | 0%                                | 100%                          | 0%                                |
| CP_32    | EVOO     | 100%                          | 0%                                | 100%                          | 0%                                |
| DEO3     | NOT EVOO | 0%                            | 100%                              | 0%                            | 100%                              |
| DEO_DEA2 | NOT EVOO | 14%                           | 86%                               | 0%                            | 100%                              |
| MIX_D    | NOT EVOO | 12%                           | 88%                               | 0%                            | 66%                               |

**Table S2:** Predicted group affinity for the samples of the validation set obtained with the ESI- PLS-DA models. According to the software rules, values higher than 65% correspond to a certain belonging of the sample to that group

## SECTION 2 – COMPOUND IDENTIFICATION

The complete list of the supposed names of the 12 selected compounds is presented in Table S3, together with their identification level [1] and their mean area values in the different groups. The “Variables trends plot” of “Compound 1” and of “Compound 7” are presented in figure S6.

| Compound ID | Name                                                                                                                                     | ID Level | Lab#1 Area values | Lab#2 Area values |
|-------------|------------------------------------------------------------------------------------------------------------------------------------------|----------|-------------------|-------------------|
| 1           | Propylene glycol - 1 Stearate                                                                                                            | 3        |                   |                   |
| 2           | 4-Phenylbutyric acid                                                                                                                     | 2        |                   | N.D.              |
| 3           | Tyrosine ethyl ester                                                                                                                     | 3        |                   | N.D.              |
| 4           | Geranic Acid                                                                                                                             | 3        |                   | N.D.              |
| 5           | 3,4,5-trimethoxydihydrocinnamic acid                                                                                                     | 3        |                   | N.D.              |
| 6           | Propyl-12-hydroxy-9-octadecenoate                                                                                                        | 3        |                   | N.D.              |
| 7           | N.A.                                                                                                                                     | 4        |                   |                   |
| 8           | N.A.                                                                                                                                     | 4        |                   |                   |
| 9           | (2R,3E)-5-(3-Chloro-5-formyl-2,6-dihydroxy-4-methylphenyl)-3-methyl-1-[(1S,2R,6R)-1,2,6-trimethyl-3-oxocyclohexyl]-3-penten-2-yl acetate | 2        |                   |                   |
| 10          | N.A.                                                                                                                                     | 4        |                   |                   |

|    |                                                                                            |   |                                                                                    |                                                                                     |
|----|--------------------------------------------------------------------------------------------|---|------------------------------------------------------------------------------------|-------------------------------------------------------------------------------------|
| 11 | N.A.                                                                                       | 4 | 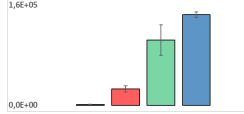 |  |
| 12 | 2,3,4-Trihydroxy-6-methyl-5-[(2E,6E)-3,7,11-trimethyl-2,6,10-dodecatrien-1-yl]benzaldehyde | 3 |  |  |

**Table S3:** compounds description and comparison of their mean area values (+/- standard error) through the groups (yellow bar: EVOO; red bar: DEO; green bar: DEA, blue bar: DEO+DEA samples) N.A.= Not available

### COMPOUND 1

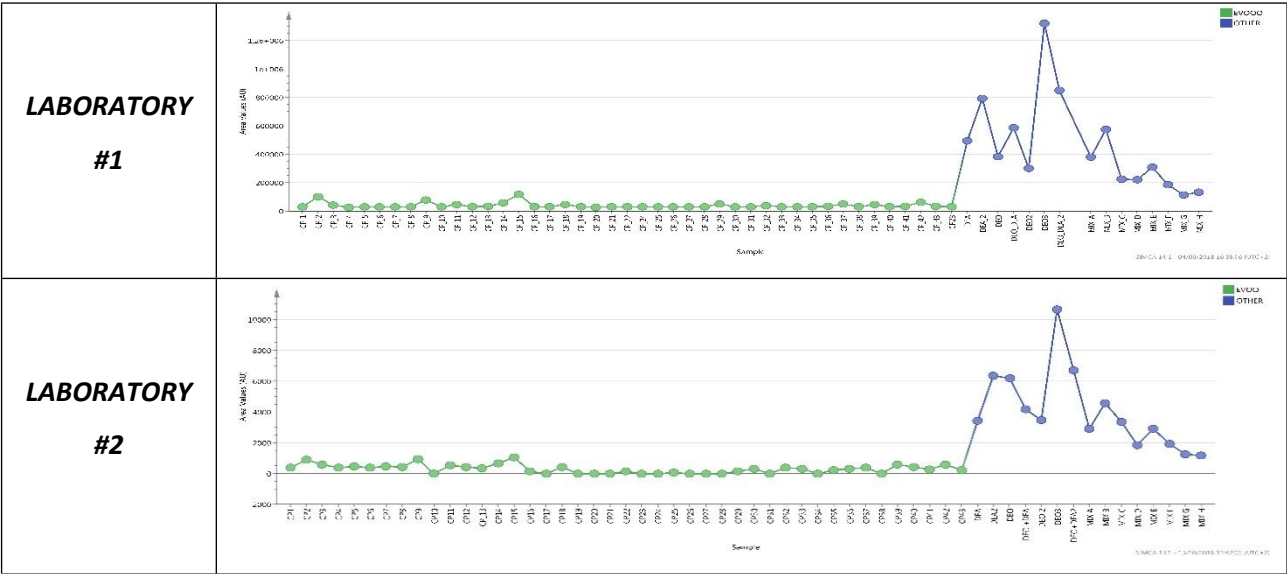

### COMPOUND 7

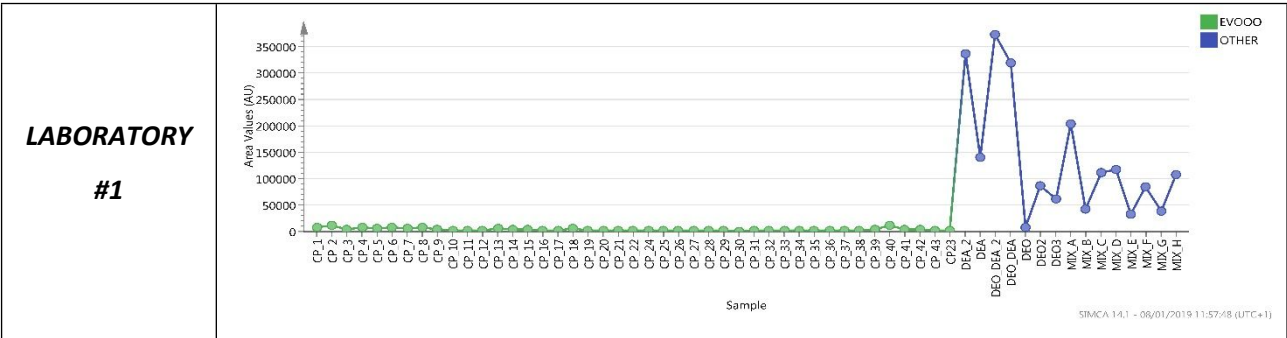



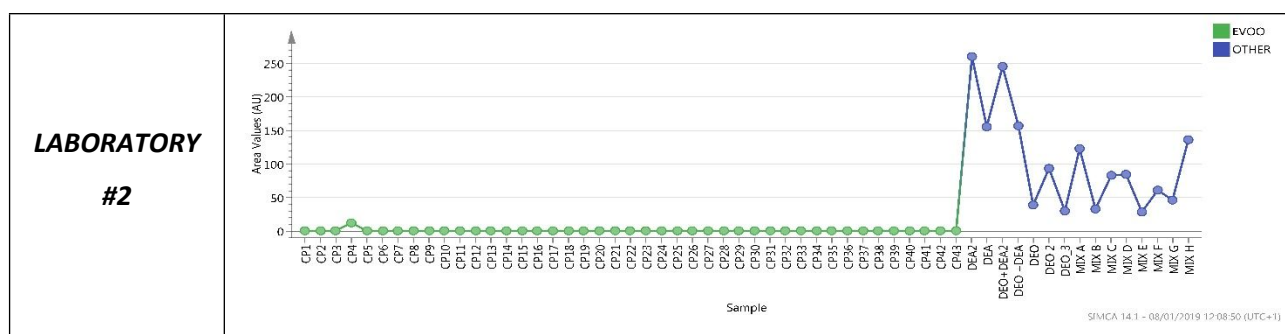

**Figure S6.** Variable trend plots of “Compound 1” and of “Compound 7”. Green dots: area values of the marker in “EVOO” group; blue dots: area values of the marker in “OTHER” group.

### SECTION 3 – EVALUATION OF THE INTER-LABORATORY STUDY

The comparison of the MS/MS spectra of the compounds selected with the two instrument is presented in the following figures

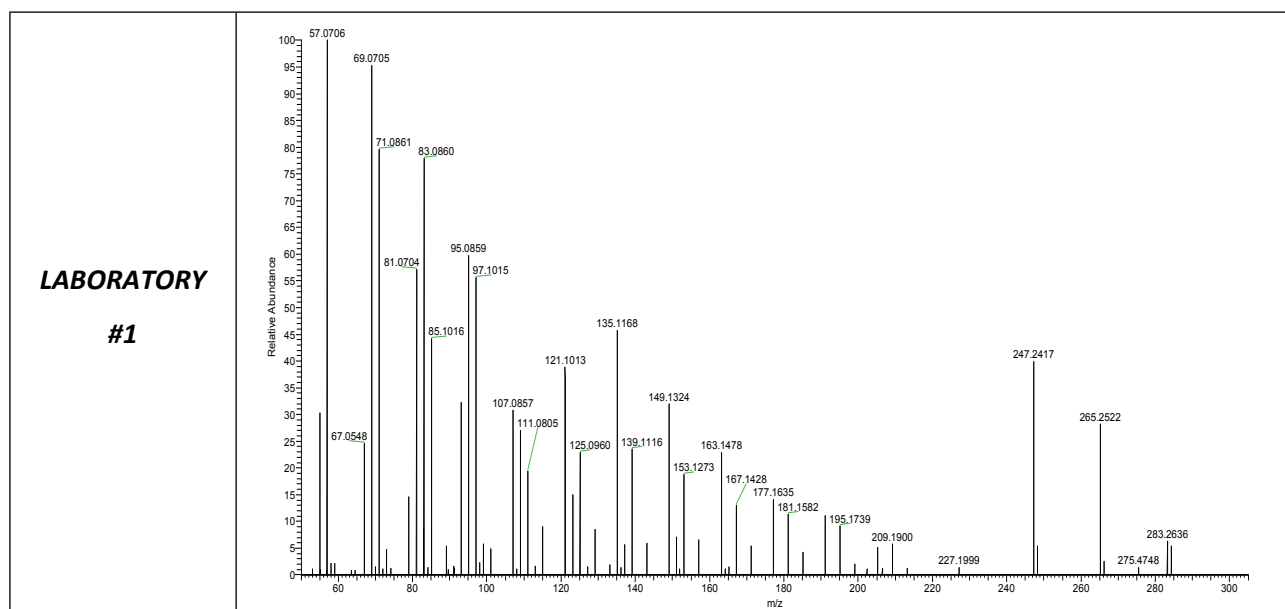

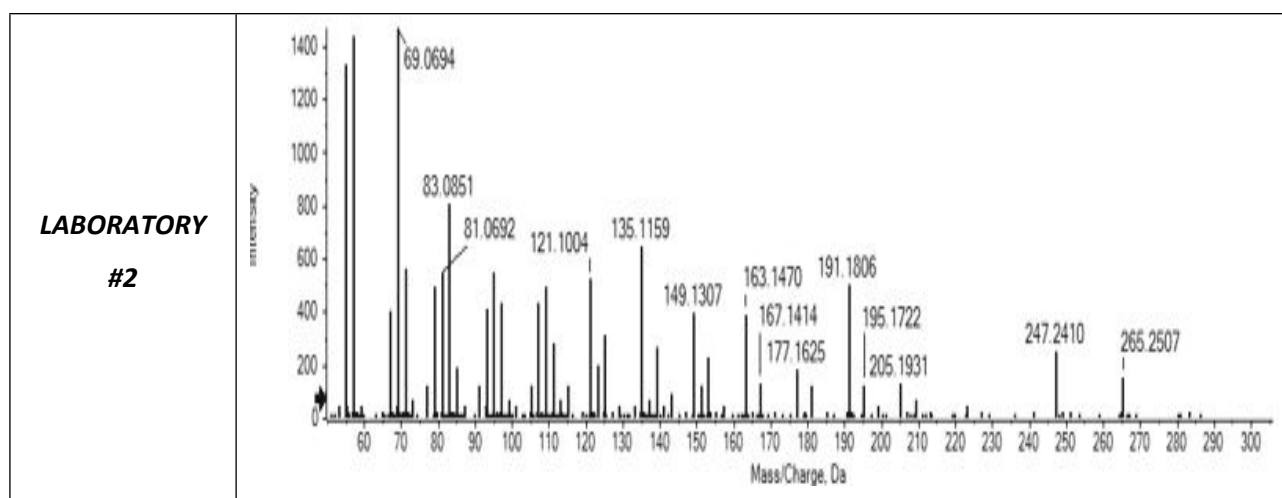

**Figure S7** Comparison of the MS/MS spectra of the “Compound 1” obtained in *Laboratory #1* and in *Laboratory #2*. Instrumental conditions are detailed in the text

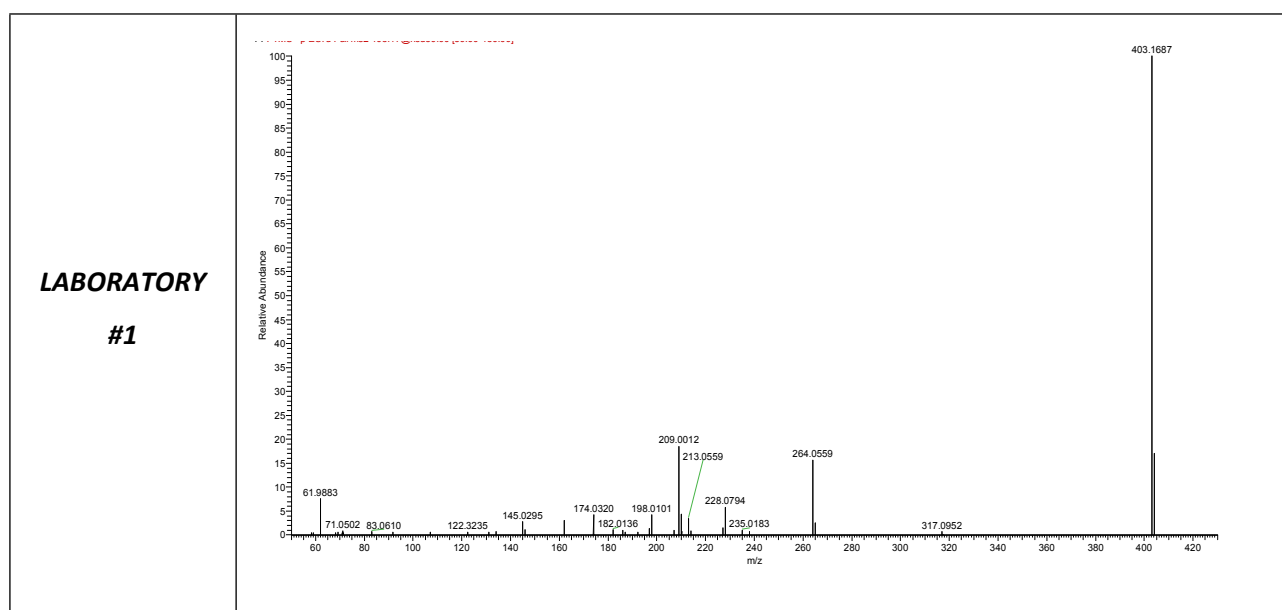

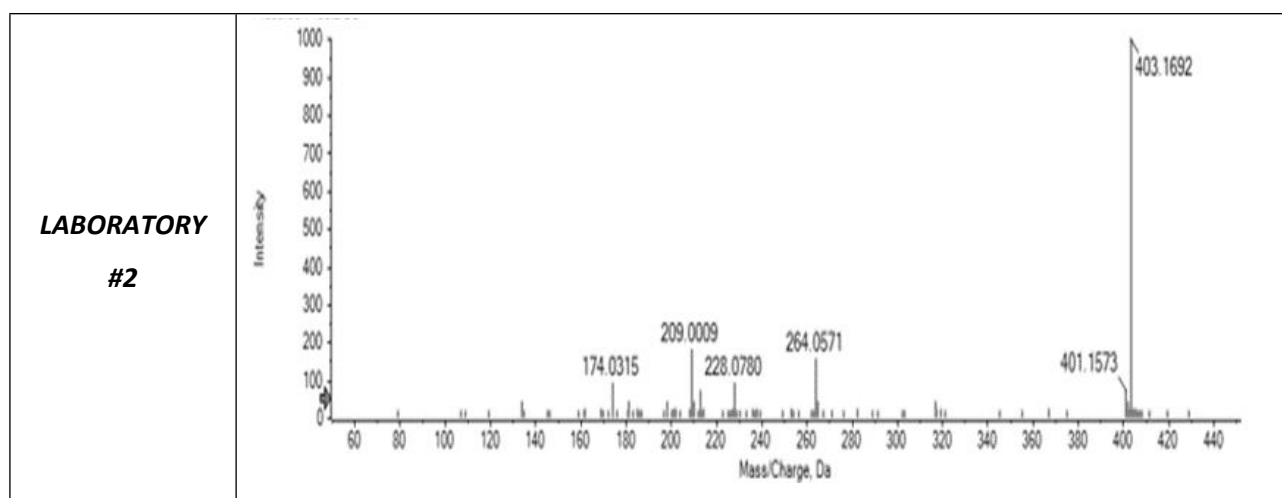

**Figure S8** Comparison of the MS/MS spectra of the “Compound 7” obtained in *Laboratory #1* and in *Laboratory #2*. Instrumental conditions are detailed in the text

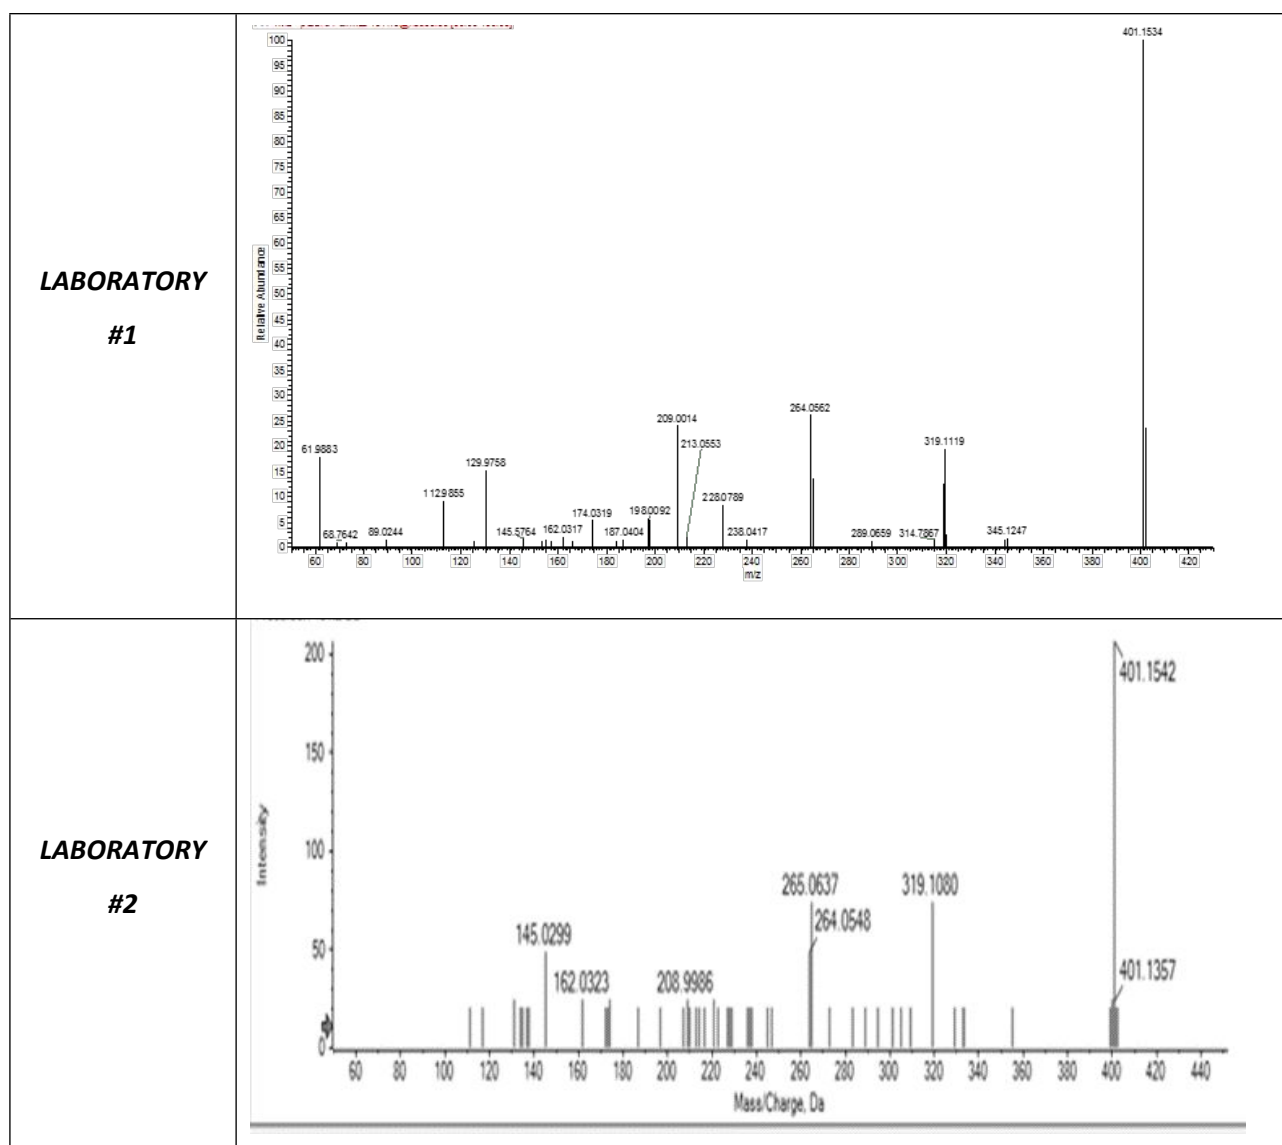

**Figure S9** Comparison of the MS/MS spectra of the “Compound 8” obtained in *Laboratory #1* and in *Laboratory #2*. Instrumental conditions are detailed in the text

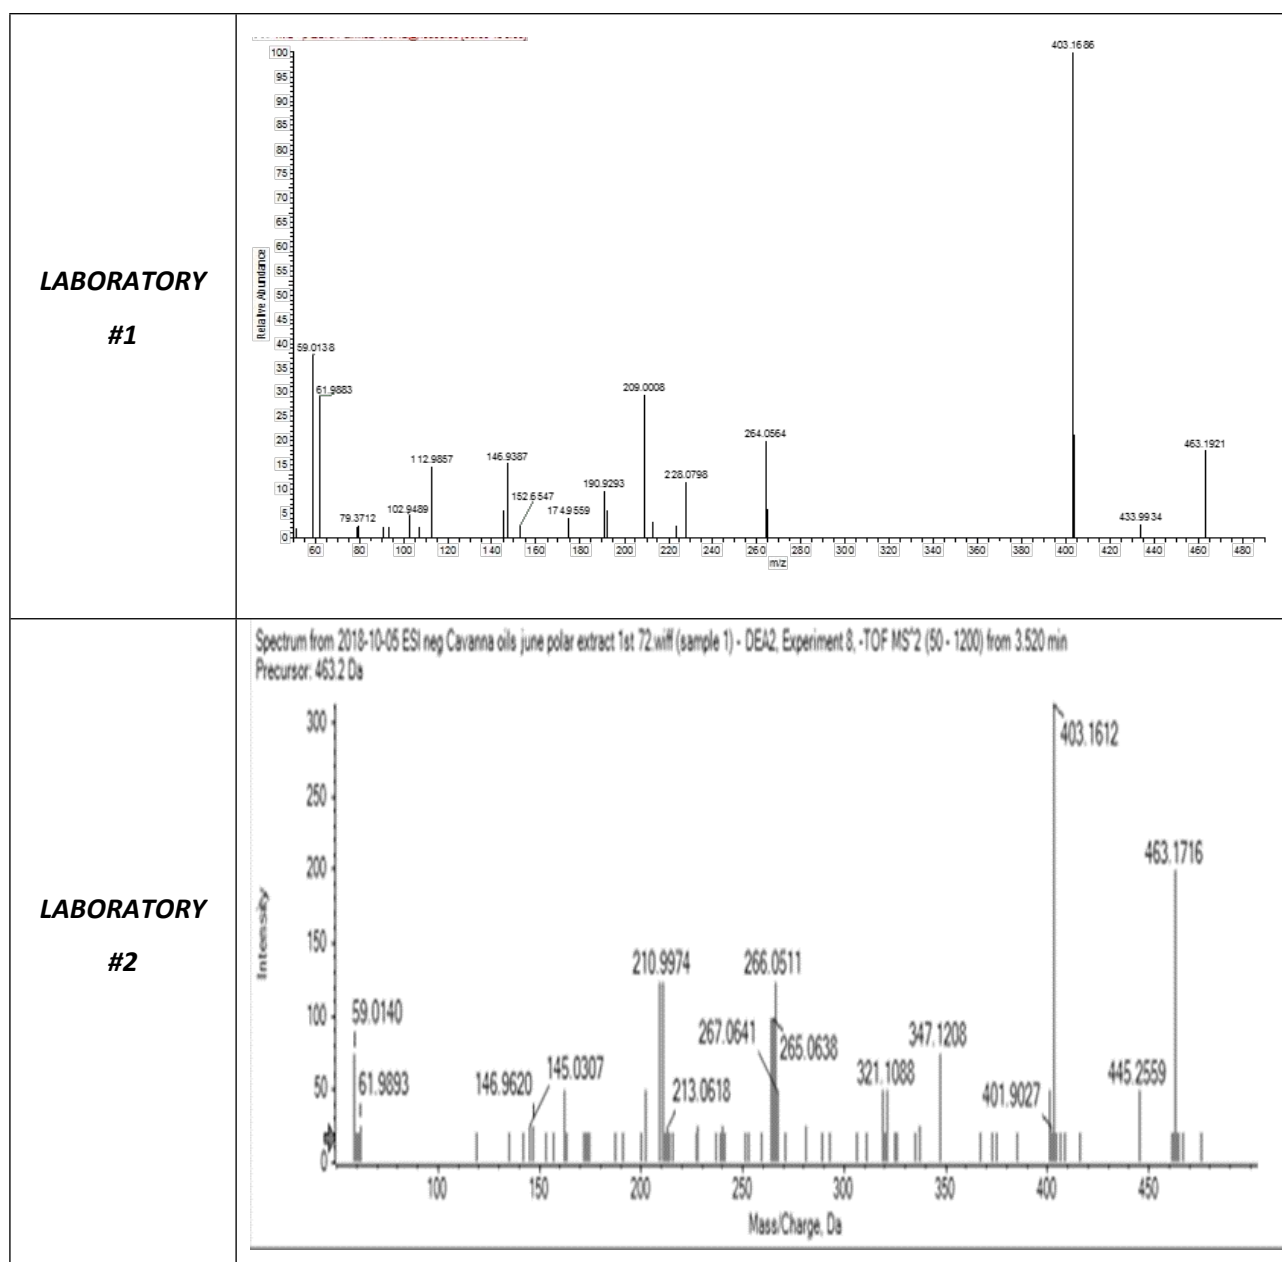

**Figure S10** Comparison of the MS/MS spectra of the “Compound 9” obtained in *Laboratory #1* and in *Laboratory #2*. Instrumental conditions are detailed in the text

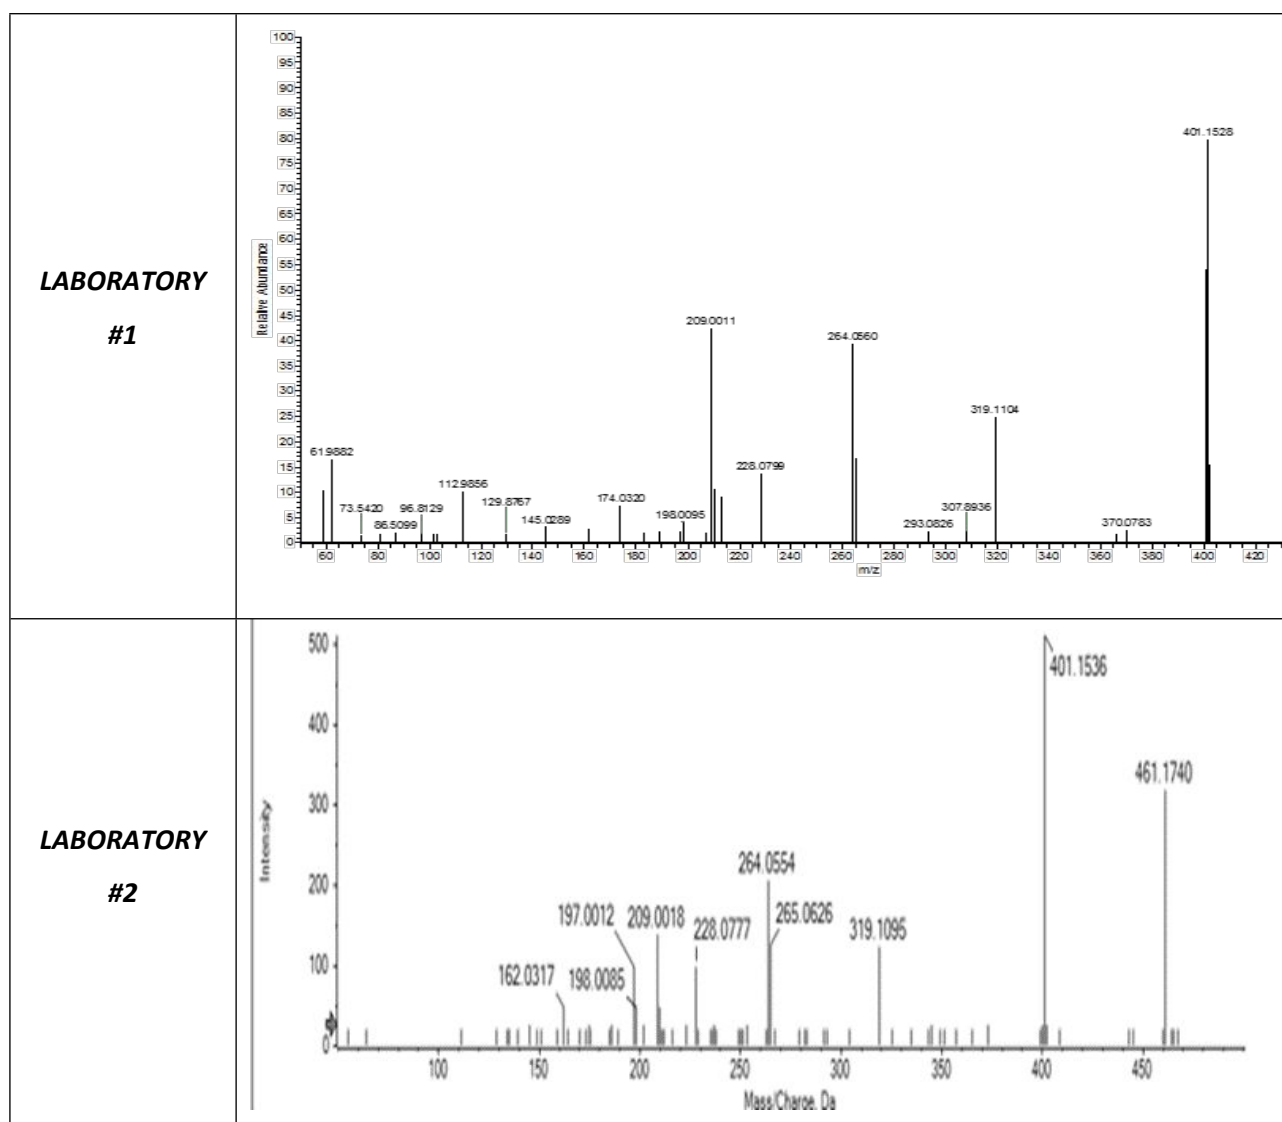

**Figure S11** Comparison of the MS/MS spectra of the “Compound 10” obtained in *Laboratory #1* and in *Laboratory #2*. Instrumental conditions are detailed in the text

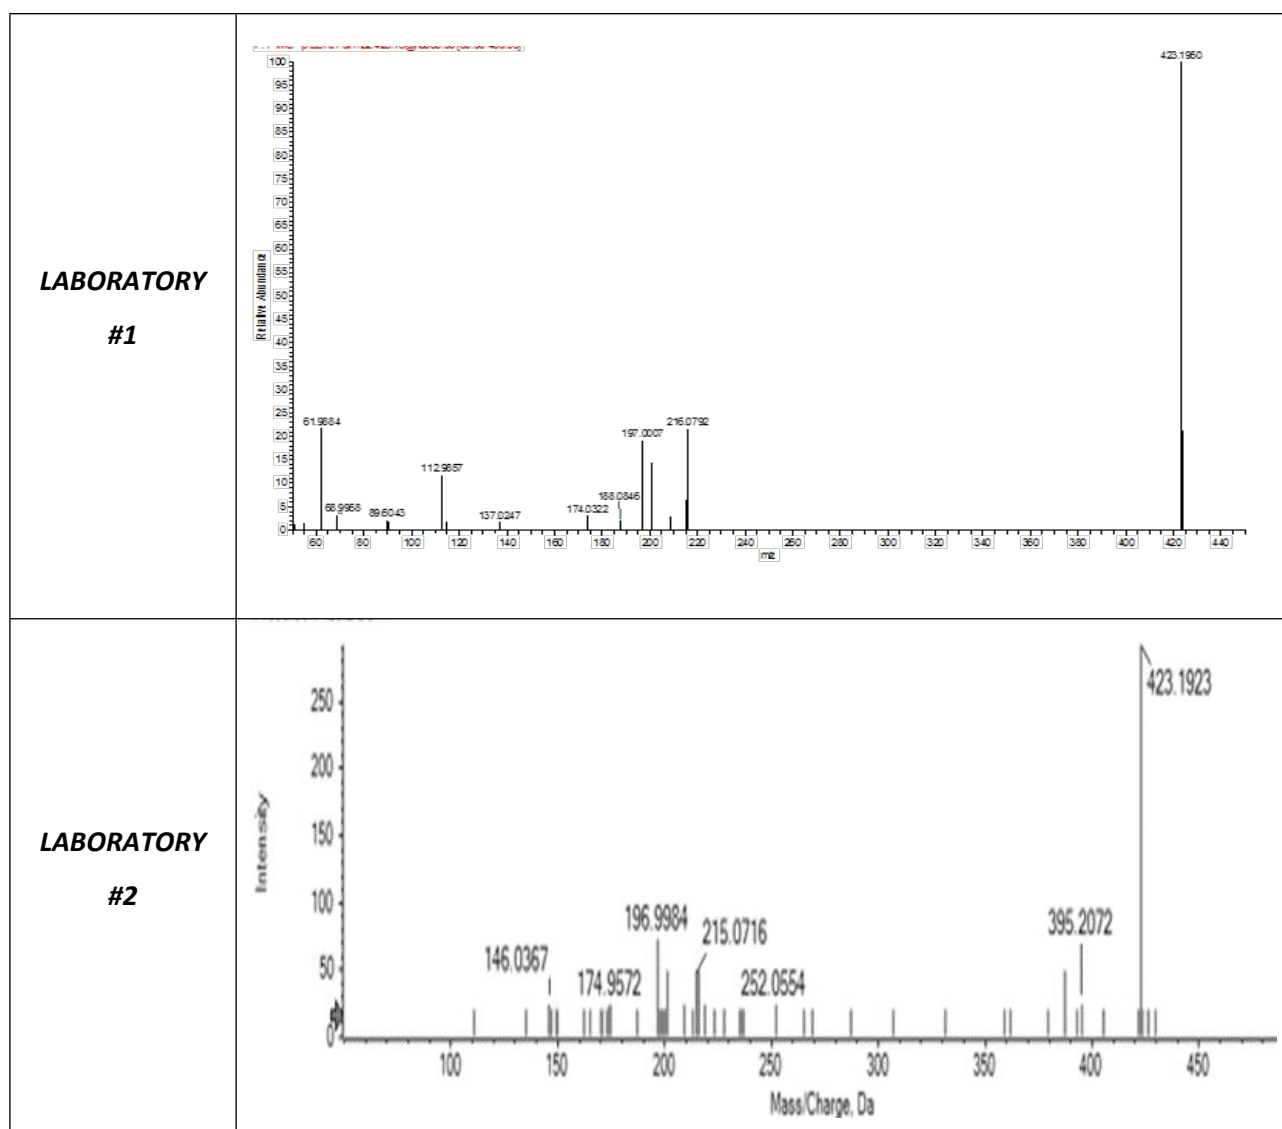

**Figure S12** Comparison of the MS/MS spectra of the “Compound 11” obtained in *Laboratory #1* and in *Laboratory #2*. Instrumental conditions are detailed in the text

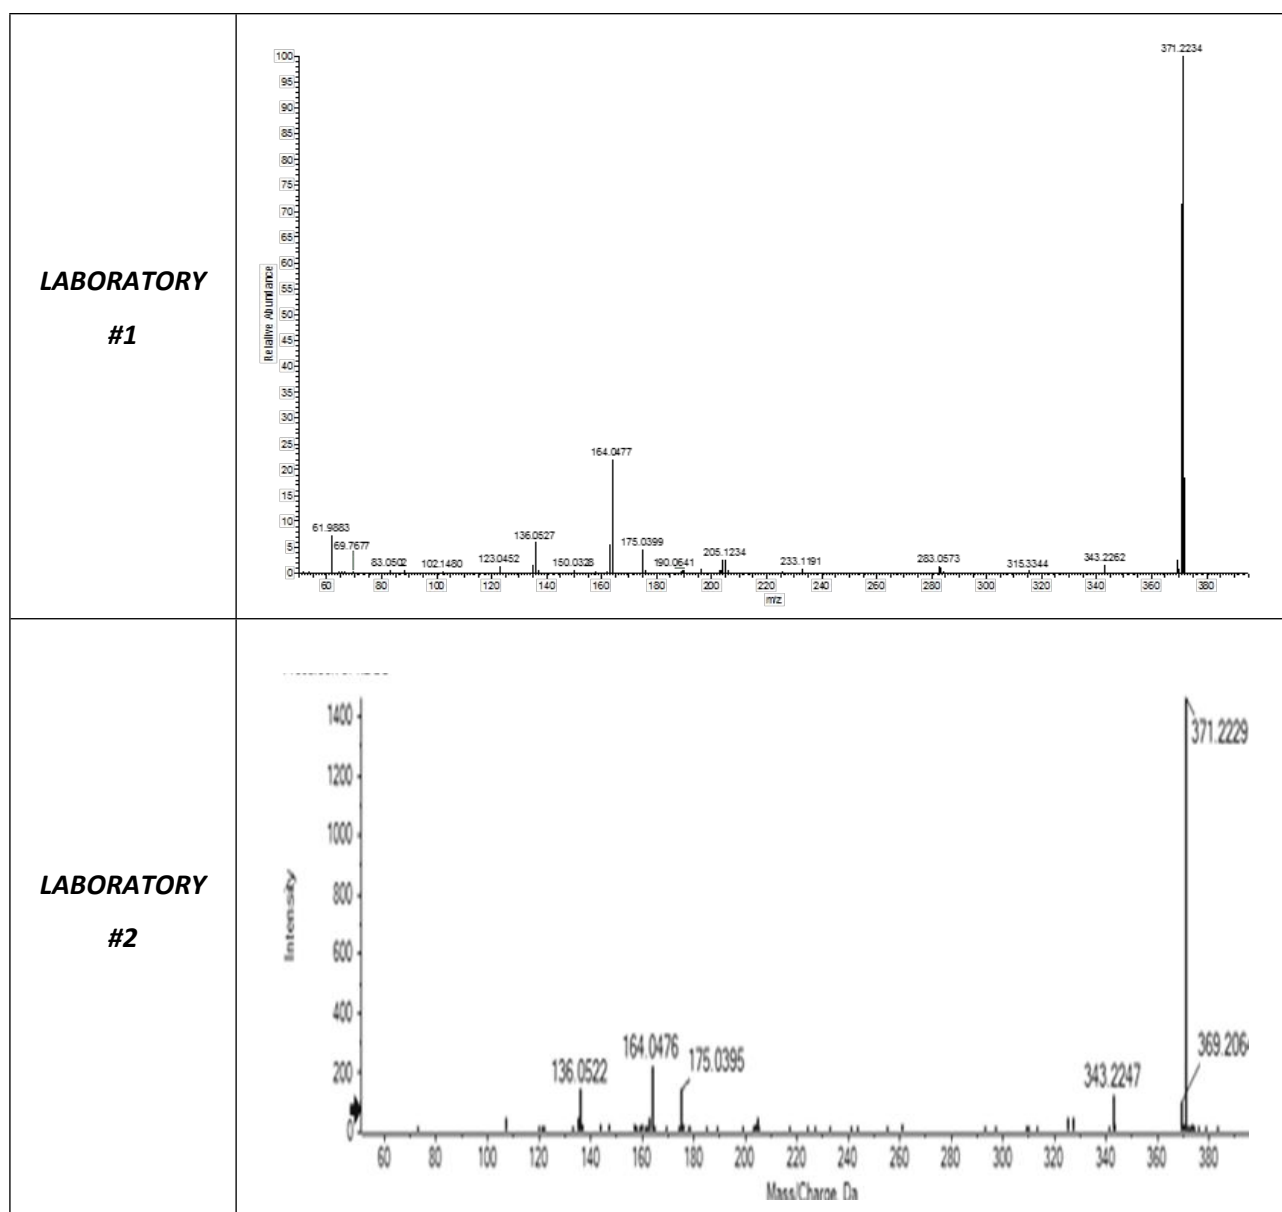

**Figure S13** Comparison of the MS/MS spectra of the “Compound 12” obtained in *Laboratory #1* and in *Laboratory #2*. Instrumental conditions are detailed in the text



## SECTION 4 – SAMPLING PLAN

The global list of the samples used in this study is detailed in table S4.

| NAME  | TYPE | YEAR      | SUPPLIER | STORAGE          |
|-------|------|-----------|----------|------------------|
| CP_1  | EVOO | 2015/2016 | 1        | 2-8°C            |
| CP_2  | EVOO | 2015/2016 | 1        | 2-8°C            |
| CP_3  | EVOO | 2015/2016 | 2        | 2-8°C            |
| CP_4  | EVOO | 2015/2016 | 2        | 2-8°C            |
| CP_5  | EVOO | 2015/2016 | 2        | 2-8°C            |
| CP_6  | EVOO | 2015/2016 | 2        | 2-8°C            |
| CP_7  | EVOO | 2015/2016 | 2        | 2-8°C            |
| CP_8  | EVOO | 2015/2016 | 2        | 2-8°C            |
| CP_9  | EVOO | 2015/2016 | 1        | 2-8°C            |
| CP_10 | EVOO | 2015/2016 | 3        | 2-8°C            |
| CP_11 | EVOO | 2015/2016 | 3        | 2-8°C            |
| CP_12 | EVOO | 2015/2016 | 3        | 2-8°C            |
| CP_13 | EVOO | 2016/2017 | 2        | 2-8°C            |
| CP_14 | EVOO | 2016/2017 | 2        | 2-8°C            |
| CP_15 | EVOO | 2016/2017 | 2        | 2-8°C            |
| CP_16 | EVOO | 2016/2017 | 2        | 2-8°C            |
| CP_17 | EVOO | 2016/2017 | 2        | 2-8°C            |
| CP_18 | EVOO | 2016/2017 | 2        | 2-8°C            |
| CP_19 | EVOO | 2016/2017 | 2        | 2-8°C            |
| CP_20 | EVOO | 2017/2018 | 2        | 2-8°C            |
| CP_21 | EVOO | 2017/2018 | 2        | 2-8°C            |
| CP_22 | EVOO | 2017/2018 | 2        | 2-8°C            |
| CP_23 | EVOO | 2017/2018 | 2        | 2-8°C            |
| CP_24 | EVOO | 2017/2018 | 2        | 2-8°C            |
| CP_25 | EVOO | 2017/2018 | 2        | 2-8°C            |
| CP_26 | EVOO | 2017/2018 | 2        | 2-8°C            |
| CP_27 | EVOO | 2017/2018 | 2        | 2-8°C            |
| CP_28 | EVOO | 2017/2018 | 2        | 2-8°C            |
| CP_29 | EVOO | 2017/2018 | 2        | 2-8°C            |
| CP_30 | EVOO | 2017/2018 | 2        | 2-8°C            |
| CP_31 | EVOO | 2017/2018 | 2        | 2-8°C            |
| CP_32 | EVOO | 2016/2017 | 2        | 2-8°C            |
| CP_33 | EVOO | 2015/2016 | 2        | 2-8°C            |
| CP_34 | EVOO | 2017/2018 | 2        | 2-8°C            |
| CP_35 | EVOO | 2017/2018 | 2        | 2-8°C            |
| CP_36 | EVOO | 2017/2018 | 2        | 2-8°C            |
| CP_37 | EVOO | 2017/2018 | 2        | 2-8°C            |
| CP_38 | EVOO | 2017/2018 | 2        | 2-8°C            |
| CP_39 | EVOO | 2015/2016 | 1        | Room Temperature |
| CP_40 | EVOO | 2015/2016 | 1        | Room Temperature |
| CP_41 | EVOO | 2015/2016 | 1        | Room Temperature |

| NAME     | TYPE                       | YEAR      | SUPPLIER | STORAGE          |
|----------|----------------------------|-----------|----------|------------------|
| CP_42    | EVOO                       | 2015/2016 | 1        | Room Temperature |
| CP_43    | EVOO                       | 2015/2016 | 1        | Room Temperature |
| DEO      | DEODORIZED                 | /         | /        | 2-8°C            |
| DEO2     | DEODORIZED                 | /         | /        | 2-8°C            |
| DEO3     | DEODORIZED                 | /         | /        | 2-8°C            |
| DEA      | DEACIDIFIED                | /         | /        | 2-8°C            |
| DEA2     | DEACIDIFIED                | /         | /        | 2-8°C            |
| DEO_DEA  | DEODORIZED AND DEACIDIFIED | /         | /        | 2-8°C            |
| DEO_DEA2 | DEODORIZED AND DEACIDIFIED | /         | /        | 2-8°C            |
| MIX A    | EVOO 25% + DEA-DEO 75%     | /         | /        | 2-8°C            |
| MIX B    | EVOO 25% + DEO 75%         | /         | /        | 2-8°C            |
| MIX C    | EVOO 55% + DEA-DEO 45%     | /         | /        | 2-8°C            |
| MIX D    | EVOO 60%+ DEA-DEO 40%      | /         | /        | 2-8°C            |
| MIX E    | EVOO 50% + DEO 50%         | /         | /        | 2-8°C            |
| MIX F    | EVOO 40% + DEO 60%         | /         | /        | 2-8°C            |
| MIX G    | Commercial DEO sample      | /         | /        | 2-8°C            |
| MIX H    | Commercial DEO sample      | /         | /        | 2-8°C            |

**Table S4:** list and description of the samples. CP\_19, CP\_26 and CP\_31 were produced with olives coming from European Union

## REFERENCES

- [1] Schymanski, E.; Jeon, J.; Gulde, R.; Fenner, K.; Ruff, M.; Singer, H.; Hollender, J. Identifying Small Molecules via High Resolution Mass Spectrometry: Communicating Confidence. *Environ. Sci. Technol.* **2014**, 48, 2097-2098.
